# Supplementary material for: Impact of M36I polymorphism on the interaction of HIV-1 protease with its substrates: insights from molecular dynamics
Source: PubMed Central journal article supplement (PMC4243740; doi:10.1186/1471-2164-15-s7-s5), 2014-10-27

Figure 9 - Similarities of the active site cleft of PR in complex with different substrates

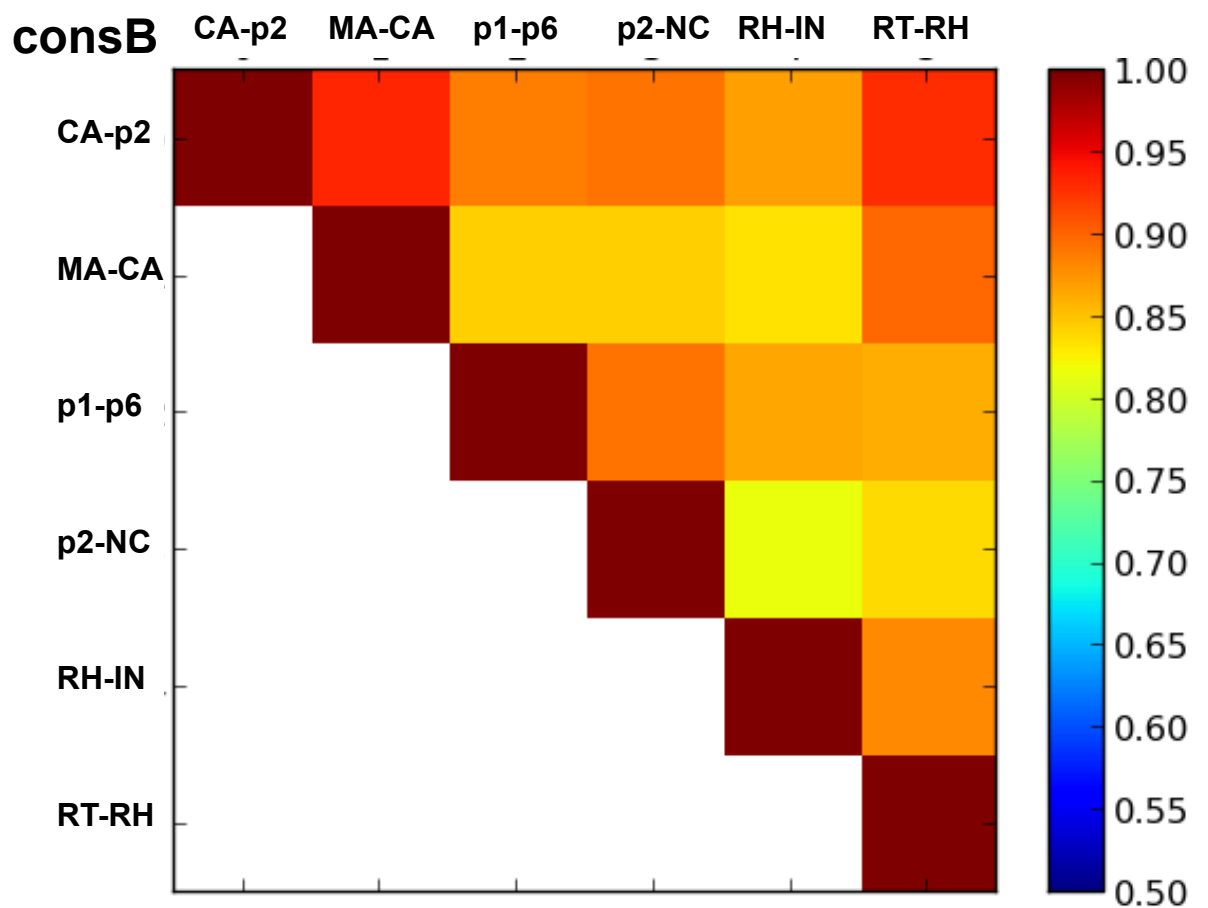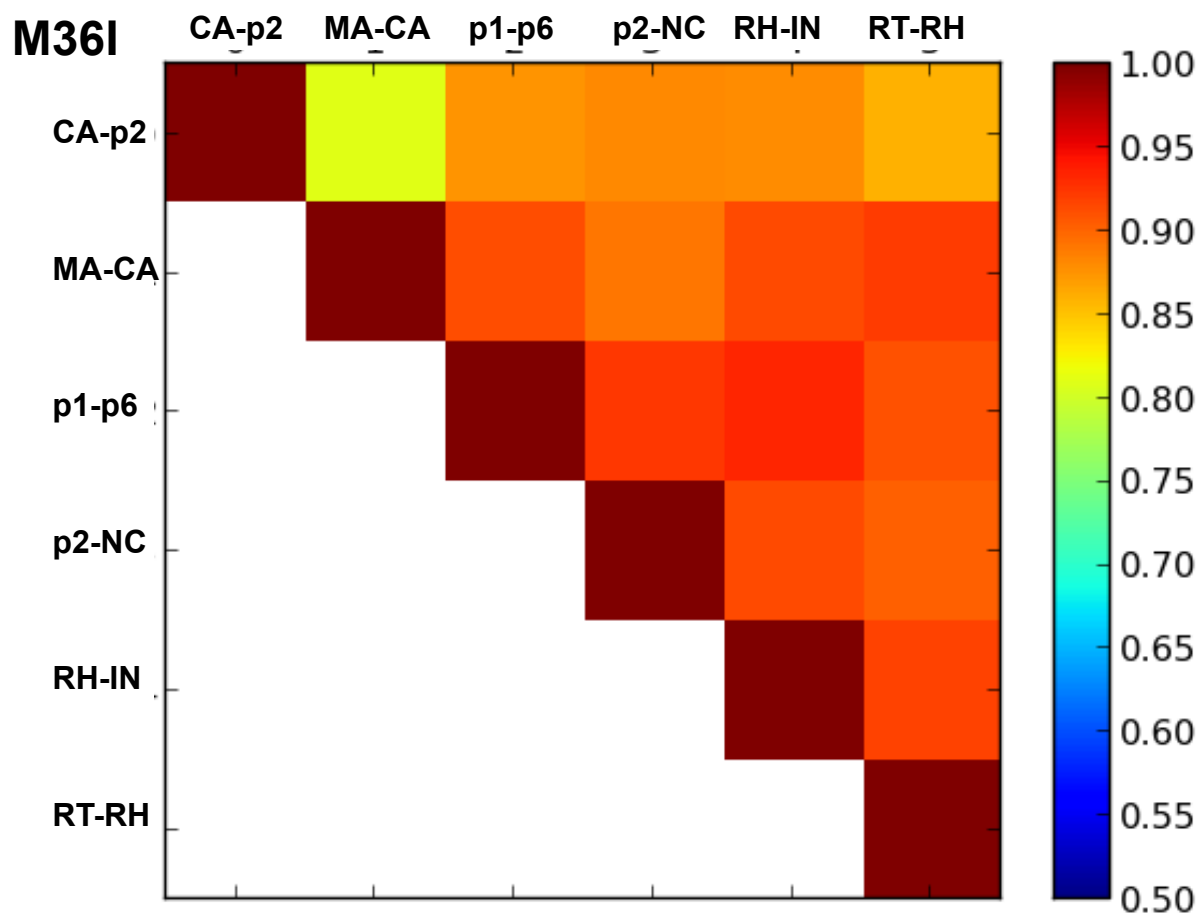

Supplement: 1471-2164-15-S7-S5-S9.pdf [file 1471-2164-15-S7-S5-S9.pdf]
